# Supplementary material
Source: Springer Nature journal article supplement (https://www.springermedizin.de/resource/supplementary/12888_2009_618_MOESM5_ESM.pdf/9483736)

2-tailed permutation-based p-value  $\leq 0.01$

2-tailed permutation-based p-value  $\leq 0.001$

bar proportional to haplotype frequency

$\geq 95\%$  cumulative haplotype frequency

D' box shading D' = <.5 .6 .7 .8 .9 1

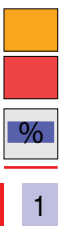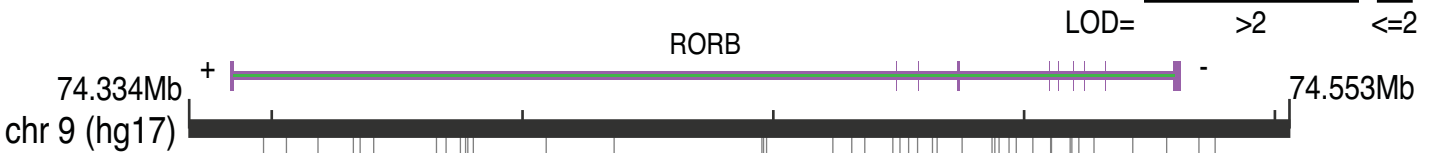

haplotype block structure

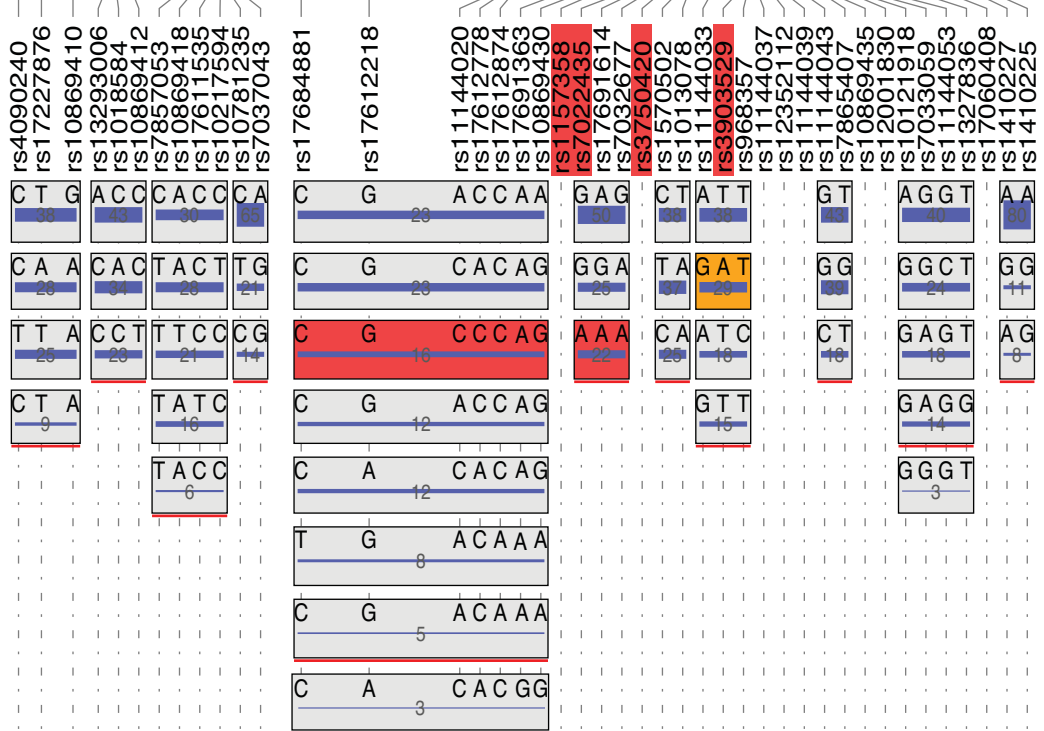

LD structure

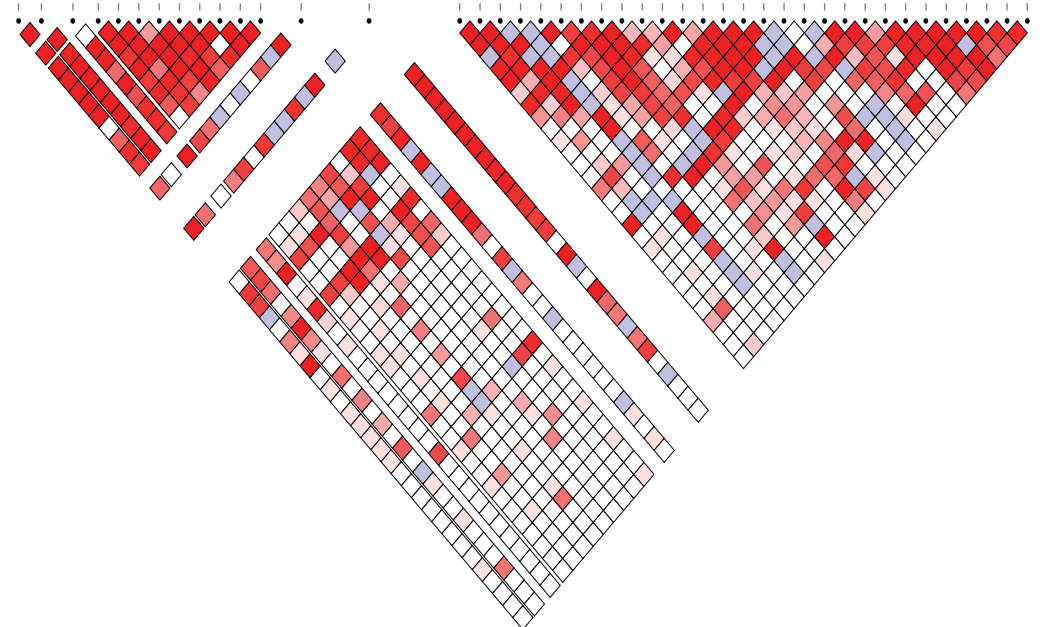

Supplement: MOESM5 [file 9483736]
